# Supplementary material for: The consequences of delaying insulin initiation in UK type 2 diabetes patients failing oral hyperglycaemic agents: a modelling study
Source: Springer Nature journal article supplement (doi:10.1186/1472-6823-9-19), 2009-10-05

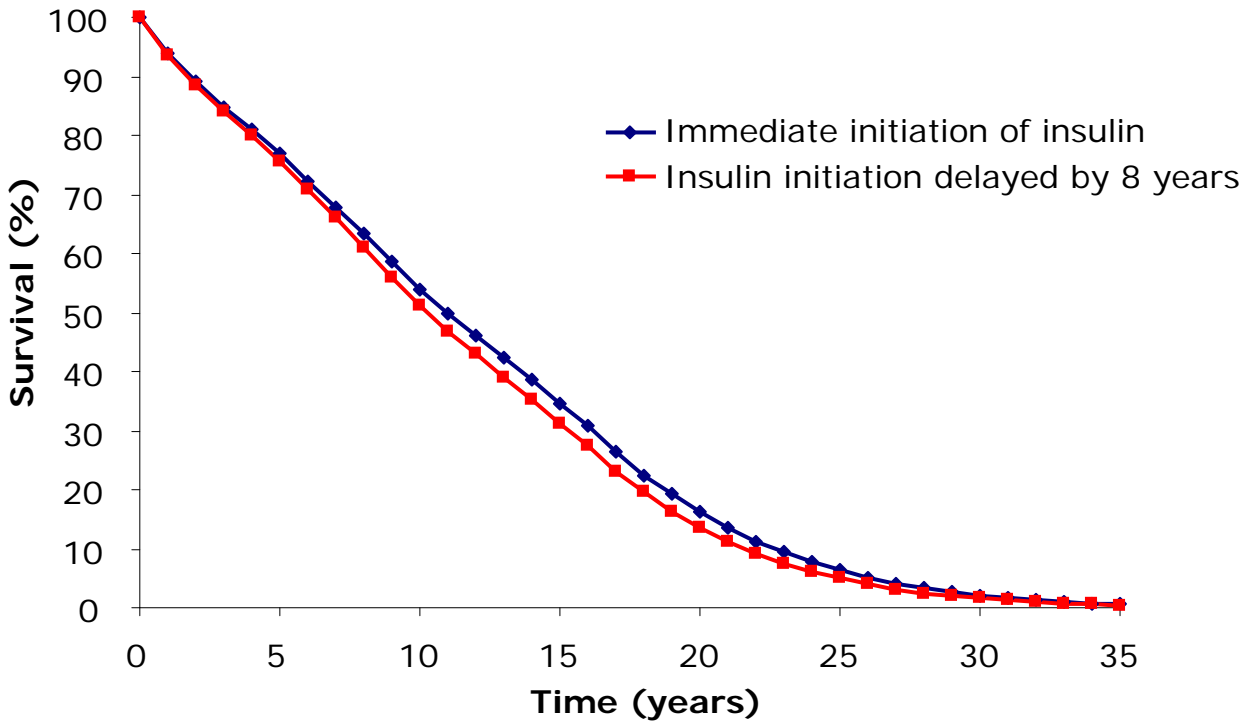

Supplement: 12902_2008_78_MOESM1_ESM.pdf [file 12902_2008_78_MOESM1_ESM.pdf]
